# Supplementary material for: Computed tomography-based radiomic features combined with clinical parameters for predicting post-infectious bronchiolitis obliterans in children with adenovirus pneumonia: a retrospective study
Source: PeerJ journal article supplement (doi:10.7717/peerj.19145), 2025-03-31
Supplement: Raw_date.zip [file Raw_date.zip]

## Sheet: 231011-Omics feature data
Label（1:PIBO,0:non-PIBO）	Group	original_firstorder_10Percentile	original_firstorder_90Percentile	original_firstorder_Energy	original_firstorder_Entropy	original_firstorder_InterquartileRange	original_firstorder_Kurtosis	original_firstorder_Maximum	original_firstorder_MeanAbsoluteDeviation	original_firstorder_Mean	original_firstorder_Median	original_firstorder_Minimum	original_firstorder_Range	original_firstorder_RobustMeanAbsoluteDeviation	original_firstorder_RootMeanSquared	original_firstorder_Skewness	original_firstorder_TotalEnergy	original_firstorder_Uniformity	original_firstorder_Variance	original_shape_Elongation	original_shape_Flatness	original_shape_LeastAxisLength	original_shape_MajorAxisLength	original_shape_Maximum2DDiameterColumn	original_shape_Maximum2DDiameterRow	original_shape_Maximum2DDiameterSlice	original_shape_Maximum3DDiameter	original_shape_MeshVolume	original_shape_MinorAxisLength	original_shape_Sphericity	original_shape_SurfaceArea	original_shape_SurfaceVolumeRatio	original_shape_VoxelVolume	original_glcm_Autocorrelation	original_glcm_JointAverage	original_glcm_ClusterProminence	original_glcm_ClusterShade	original_glcm_ClusterTendency	original_glcm_Contrast	original_glcm_Correlation	original_glcm_DifferenceAverage	original_glcm_DifferenceEntropy	original_glcm_DifferenceVariance	original_glcm_JointEnergy	original_glcm_JointEntropy	original_glcm_InverseVariance	original_glcm_MaximumProbability	original_glcm_SumEntropy	original_glcm_Idn
0	Train	-416	57	51136180269	4.34	288	2.91	1275	163.301	-113.446	-15	-1004	2279	123.763	222.636	-0.979	15239754418	0.076	36696.8	0.316	0.277	59.774	216.116	183.95	117.352	182.15	185.329	307288	68.219	0.374	58908.5	0.192	307460	1435.11	37.193	131099	-3132.49	215.406	8.387	0.924	1.929	2.591	4.441	0.018	7.368	0.401	0.068	5.197	0.98
0	Train	-481	-35	2768454291	4.745	244	2.439	282	136.115	-265.706	-271	-800	1082	100.033	313.069	-0.028	5.33334e+08	0.041	27412.6	0.508	0.385	27.326	71.047	112.297	43.356	45.493	114.371	5395.82	36.093	0.321	4640.44	0.86	5441.5	557.062	22.872	54688.4	-155.266	150.774	16.169	0.804	2.993	3.041	6.425	0.004	8.468	0.302	0.009	5.617	0.939
0	Train	-279	46	1003959203	3.967	162	4.149	507	105.995	-71.116	-17	-662	1169	71.522	151.319	-1.32	1.9341e+08	0.092	17839.9	0.302	0.202	33.797	166.964	80.921	41.565	97.538	124.003	8387.92	50.374	0.332	6008.99	0.716	8446.79	660.681	25.429	26857.1	-922.669	74.858	19.068	0.575	2.751	2.996	10.631	0.022	6.987	0.352	0.072	4.669	0.95
0	Test	-350	10	1455457898	4.384	210	2.415	109	112.582	-166.827	-162	-649	758	85.105	214.824	-0.325	4.3376e+08	0.052	18318.2	0.342	0.293	35.963	122.903	113.322	59.201	105.913	124.504	9337.34	41.979	0.383	5598.48	0.6	9399.05	442.399	20.55	20484.3	-262.142	92.221	12.189	0.761	2.515	2.873	5.408	0.007	7.794	0.343	0.025	5.197	0.929
0	Train	-427	47	11122355314	4.538	287	2.701	288	158.614	-137.595	-71	-915	1203	121.11	232.321	-0.847	2684921895	0.058	35040.7	0.342	0.201	35.737	177.523	139.312	113.162	147.298	149.663	49682.1	60.758	0.3	21791	0.439	49745.5	1109.19	32.624	105379	-2429.27	191.177	12.128	0.878	2.405	2.853	5.957	0.011	7.819	0.361	0.044	5.369	0.955
0	Train	-343	56	6967961614	4.131	182	4.389	515	129.882	-77.915	-4	-849	1364	84.903	182.354	-1.446	1593541153	0.09	27182.3	0.61	0.278	42.096	151.695	150.03	100.977	143.927	153.947	47807.9	92.482	0.276	23046.5	0.482	47921.5	1060.45	32.094	89786.9	-2465.72	133.374	12.171	0.825	2.207	2.769	6.959	0.024	7.084	0.378	0.086	4.851	0.963
0	Test	-357	27	208948417	4.203	218	3.828	88	127.803	-116.751	-57.5	-775	863	91.44	195.804	-1.193	4.91039e+07	0.077	24708.4	0.376	0.243	7.955	32.676	18.254	28.197	28.924	31.637	1269.04	12.282	0.491	1154.47	0.91	1280.78	802.082	28.004	41922.7	-1223.09	96.512	25.932	0.554	3.383	3.278	13.432	0.017	7.334	0.311	0.075	4.851	0.92
0	Test	-354	36	366611909	4.233	194	4.597	150	127.929	-106.977	-45	-877	1027	85.327	195.44	-1.429	8.23182e+07	0.076	26752.5	0.732	0.296	8.673	29.276	26.198	36.196	33.232	36.676	2144.49	21.424	0.43	1869.94	0.872	2155.11	1123.56	33.265	58592.7	-1600.19	101.328	33.842	0.482	3.921	3.468	16.979	0.013	7.572	0.285	0.052	4.899	0.923
0	Train	-203	68	7131642040	3.366	65	8.914	927	88.471	-16.945	32	-833	1760	40.128	131.374	-2.369	6.23044e+08	0.165	16972.1	0.694	0.549	35.472	64.653	57.006	77.498	76.945	84.783	36061.3	44.838	0.342	15431.2	0.428	36099.1	1190.77	34.253	59614.3	-1718.49	77.649	7.746	0.804	1.555	2.306	5.079	0.054	5.741	0.426	0.137	4.097	0.98
0	Test	-375	64	4525723579	4.304	220	4.041	214	144.566	-89.523	-9	-925	1139	98.507	201.561	-1.338	1054006873	0.077	32612.6	0.337	0.241	33.292	137.983	115.578	59.493	110.684	122.761	25881.6	46.47	0.346	12224.8	0.472	25943.5	1245.39	34.78	116309	-2918.07	155.598	13.25	0.834	2.394	2.867	7.099	0.018	7.389	0.359	0.069	5.045	0.953
0	Test	-182	50	5973512863	3.471	76	9.212	237	77.767	-31.722	8	-831	1068	38.75	118.48	-2.356	1127992764	0.142	13031.1	0.695	0.449	36.702	81.826	82.756	81.46	93.246	106.495	80303.4	56.864	0.358	25167.2	0.313	80355.9	1132.41	33.426	42501	-1298.42	66.951	6.574	0.815	1.528	2.304	4.035	0.04	6.074	0.431	0.099	4.298	0.968
0	Train	-399	56	1251254540	4.44	213	4.544	367	146.833	-106.3	-32	-909	1276	95.895	216.358	-1.443	6.10964e+08	0.066	35511.2	0.703	0.481	23.964	49.872	43.754	75.728	54.819	76.857	12939.8	35.067	0.343	7765.86	0.6	13051.8	1210.02	34.325	130327	-3058.96	151.208	25.175	0.697	3.33	3.293	13.604	0.011	7.898	0.318	0.04	5.12	0.944
0	Train	-249	51	1014189558	3.781	92	8.004	322	100.13	-49.809	3	-838	1160	49.402	153.251	-2.179	2.64802e+08	0.123	21004.9	0.281	0.181	24.861	137.414	89.555	45.666	121.383	124.363	11171.6	38.583	0.191	12673.3	1.134	11274.9	1120.28	33.206	66243.8	-1776.42	82.891	12.409	0.733	2.051	2.674	8.018	0.036	6.492	0.39	0.107	4.477	0.961
0	Test	-22	72	381757331	2.744	42	30.486	229	36.59	23.933	36	-922	1151	18.283	68.672	-4.166	1.19299e+08	0.207	4142.99	0.701	0.607	29.978	49.388	43.829	65.206	55.068	66.212	25239.9	34.644	0.422	9864.51	0.391	25297.8	1493.05	38.6	10499.8	-314.256	17.503	5.286	0.522	1.367	2.148	3.344	0.055	5.09	0.467	0.123	3.432	0.973
0	Train	-351	54	9432024367	4.184	180	4.841	478	131.849	-83.607	-10	-1024	1502	84.155	189.071	-1.535	2677649540	0.086	28757.6	0.415	0.304	48.26	158.582	118.914	95.132	133.65	146.774	74794.7	65.844	0.269	31935.9	0.427	74903.9	1536.85	38.799	108218	-2756.08	139.734	14.285	0.806	2.415	2.876	8.092	0.019	7.328	0.373	0.059	4.949	0.964
0	Test	-245	86	1609933698	4.006	107	9.076	312	113.001	-32.187	26	-1024	1336	55.057	169.543	-2.346	4.34843e+08	0.102	27708.7	0.588	0.49	22.849	46.638	38.809	52.023	50.751	54.917	15087.4	27.405	0.437	6758.35	0.448	15127.8	1675.67	40.56	199071	-4057.84	138.938	16.713	0.778	2.301	2.779	10.952	0.025	7.031	0.382	0.08	4.837	0.962
0	Test	-222	63	698972637	3.787	94	9.801	325	97.587	-40.177	10	-1007	1332	47.521	150.804	-2.46	2.0831e+08	0.114	21127.7	0.284	0.123	23.564	191.783	136.694	55.71	140.328	143.627	9103.87	54.532	0.341	6192.03	0.68	9159.74	1663.6	40.54	96813.5	-2296.53	89.789	9.628	0.79	1.838	2.545	6.053	0.031	6.437	0.403	0.093	4.487	0.969
0	Train	-298	59	36246200805	4.053	164	4.774	849	115.707	-66.658	-5	-938	1787	75.142	163.063	-1.495	2735930079	0.089	22146.5	0.785	0.508	41.567	81.856	123.884	98.003	87.755	125.999	102847	64.288	0.255	41550.4	0.404	102894	1326.61	36.012	77665.1	-2152.15	126.303	7.257	0.889	1.767	2.451	3.801	0.021	6.934	0.41	0.072	4.922	0.977
0	Test	-286.1	39	1091551979	4.021	167	4.222	196	107.153	-81.219	-29	-782	978	73.841	157.042	-1.299	6.4715e+07	0.086	18065.8	0.685	0.499	17.946	35.932	33.361	34.898	32.02	37.208	2607.08	24.606	0.318	2884.16	1.106	2624.05	906.834	29.774	42354.2	-1286.09	91.978	10.771	0.783	2.092	2.645	5.758	0.022	6.904	0.375	0.073	4.817	0.953
0	Train	-10	67	2487091026	2.563	37	35.786	836	30.174	25.337	33	-819	1655	15.773	60.003	-4.142	5.68786e+08	0.234	2958.36	0.788	0.568	51.451	90.608	91.842	114.372	105.63	114.657	157896	71.368	0.33	42774.2	0.271	157983	1200.29	34.61	6248.77	-197.314	12.802	2.988	0.604	1.065	1.872	1.791	0.071	4.691	0.478	0.158	3.267	0.985
0	Test	-321	60	1194730431	4.226	209	3.929	143	127.321	-83.474	-23	-764	907	89.789	178.59	-1.232	1.9709e+08	0.075	24926.5	0.488	0.317	20.851	65.875	73.812	50.674	45.913	74.311	6132.18	32.156	0.297	5446.18	0.888	6179.48	873.48	29.186	47597.1	-1368.62	104.745	19.13	0.668	2.739	3.001	10.759	0.02	7.244	0.345	0.074	4.9	0.937
0	Train	-26	76	1640147471	2.852	51	16.154	267	34.145	24.304	28	-663	930	21.553	55.106	-2.056	5.82879e+08	0.176	2446.03	0.608	0.429	49.048	114.212	123.286	119.615	96.757	124.257	191809	69.398	0.283	56766.1	0.296	191945	817.139	28.556	1913.8	-72.004	10.498	3.702	0.472	1.42	2.172	1.647	0.037	5.445	0.453	0.077	3.536	0.965
0	Test	-505	-38	1523248421	4.83	256	2.529	267	143.923	-270.434	-264	-940	1207	105.5	322.398	-0.198	411429272	0.039	30806	0.646	0.395	52.145	131.994	92.846	59.971	36.252	113.968	3910.39	85.315	0.359	3343.44	0.855	3958.31	836.271	28.348	68437.3	-561.411	160.936	30.674	0.679	4.179	3.468	11.732	0.003	8.964	0.237	0.006	5.668	0.925
0	Train	-242	52	1334794718	3.561	99	6.786	630	96.8	-41.739	14	-746	1376	52.349	140.112	-1.992	3.97799e+08	0.143	17889.2	0.479	0.191	27.845	146.166	121.485	56.337	124.908	125.247	20171.8	70.077	0.353	10159.4	0.504	20263.5	877.732	29.386	40601.6	-1304.38	73.016	16.498	0.613	2.34	2.794	10.54	0.042	6.267	0.383	0.13	4.268	0.963
0	Train	-355	53	4600611228	4.21	194	4.672	959	133.84	-88.924	-14	-918	1877	88.074	192.309	-1.47	1437691009	0.083	29075.2	0.444	0.242	40.029	165.568	119.114	71.222	123.42	138.184	38777.4	73.503	0.323	17131.1	0.442	38874.7	1238.96	34.762	93259.5	-2463.09	134.515	12.826	0.816	2.316	2.827	7.165	0.019	7.252	0.378	0.063	4.923	0.972
0	Test	-356	64	7162574166	4.28	180	4.647	454	133.53	-81.394	-12	-915	1369	84.234	191.019	-1.5	7.83455e+08	0.075	29863	0.428	0.373	32.224	86.477	47.419	100.795	98.021	107.815	21439.3	37.004	0.439	8495.27	0.396	21471.5	1253.47	34.938	109521	-2827.32	144.914	14.002	0.816	2.452	2.854	7.554	0.013	7.494	0.368	0.039	5.028	0.96
0	Test	-366.2	1	126522327	4.394	217.5	2.492	85	117.799	-163.426	-142	-597	682	88.848	215.714	-0.554	2.3652e+07	0.053	19824.6	0.574	0.212	6.196	29.213	25.94	19.376	30.315	30.676	495.429	16.755	0.437	692.628	1.398	508.288	397.951	19.483	20980.5	-559.654	84.871	13.358	0.714	2.768	2.97	5.391	0.007	7.636	0.317	0.024	5.049	0.915
0	Train	-327	49	3005794788	4.31	202	3.655	267	123.024	-96.335	-45	-813	1080	86.805	180.24	-1.115	626068332	0.067	23205.9	0.41	0.291	41.162	141.358	106.606	91.039	116.904	120.933	19191.8	58.026	0.293	11843	0.617	19271.8	949.763	30.457	45955	-1303.86	104.917	16.921	0.708	2.814	3.035	8.238	0.012	7.639	0.331	0.045	5.048	0.943
0	Test	-142	54	1150850957	3.033	45	10.81	322	67.083	-12.347	23	-722	1044	26.659	105.41	-2.712	3.05643e+08	0.203	10958.7	0.845	0.608	26.443	43.524	52.207	54.719	45.672	57.174	27473.7	36.775	0.582	7571.86	0.276	27507.7	874.533	29.406	25924.3	-884.318	45.236	6.107	0.749	1.423	2.235	4.002	0.069	5.254	0.442	0.168	3.697	0.969
0	Train	-105	59	1312364560	3.102	52	11.868	416	56.269	-3.638	23	-723	1139	26.09	87.46	-2.686	3.25307e+08	0.177	7636.09	0.668	0.615	35.076	57.067	86.849	54.152	92.776	93.216	42474.9	38.103	0.492	11971.5	0.282	42527.5	877.579	29.48	20076.5	-699.856	39.826	5.716	0.745	1.478	2.277	3.403	0.049	5.615	0.44	0.129	3.889	0.97
0	Train	-376	53	4714626871	4.502	250	2.935	346	141.32	-116.223	-63	-760	1106	104.881	205.797	-0.879	1000878850	0.057	28844.7	0.559	0.453	45.1	99.579	96.67	93.948	63.128	97.802	23540	55.691	0.291	13662.8	0.58	23632.2	789.696	27.48	72022.5	-1772.22	151.718	13.867	0.828	2.512	2.908	6.998	0.011	7.838	0.348	0.047	5.33	0.95
0	Train	-304	57	11228711731	4.342	186	3.722	866	114.826	-88.354	-47	-924	1790	79.537	168.865	-1.035	3346413602	0.062	20709.1	0.505	0.274	49.394	180.062	153.884	103.21	148.505	161.9	117210	90.973	0.256	45246.1	0.386	117354	1203.99	34.366	43194.7	-1163.95	106.033	14.162	0.76	2.646	2.962	6.772	0.008	7.836	0.341	0.025	5.177	0.966
0	Test	-172	57	3490623368	3.292	61	8.916	526	75.675	-18.298	22	-803	1329	34.273	113.817	-2.385	6.59143e+08	0.169	12619.4	0.352	0.302	33.203	110.058	96.948	48.972	114.921	116.113	50824.4	38.712	0.448	14800.5	0.291	50882.4	1108.94	33.088	36386	-1197.51	61.239	4.881	0.845	1.326	2.165	3.008	0.056	5.628	0.438	0.149	4.037	0.977
0	Train	-421	16	771955408	4.522	293	1.858	87	142.349	-197.052	-193	-734	821	116.046	256.088	-0.173	1.44309e+08	0.047	26751.7	0.97	0.566	10.433	18.422	20.722	21.224	22.895	23.434	2191.86	17.867	0.617	1323.29	0.604	2200.47	576.396	23.331	40046.2	-466.593	143.357	15.596	0.8	2.88	2.993	6.316	0.006	7.991	0.31	0.035	5.388	0.926
0	Test	-251	59	1035607358	3.852	133	6.194	283	103.235	-48.703	8	-902	1185	62.424	145.653	-1.789	3.08635e+08	0.109	18843	0.715	0.28	29.919	106.906	112.765	90.669	82.313	119.339	14489.8	76.408	0.361	7954.8	0.549	14548	1330.64	36.223	49854.2	-1490.11	83.859	10.08	0.775	2.033	2.676	5.758	0.029	6.664	0.396	0.091	4.53	0.962
0	Train	-280	60	2192112171	3.978	145	5.06	189	108.199	-57.694	-1	-803	992	67.604	152.091	-1.565	1.949e+08	0.094	19803	0.397	0.292	47.271	161.845	88.266	89.67	115.64	116.273	8392.93	64.249	0.315	6334.43	0.755	8425.69	1036.77	31.887	48514.2	-1486.99	90.242	10.733	0.774	2.125	2.695	5.882	0.021	6.874	0.393	0.062	4.676	0.954
0	Train	-109	77	3032869611	3.355	61	12.135	1128	64.334	2.487	31	-923	2051	29.353	102.078	-2.692	9.47772e+08	0.147	10413.6	0.419	0.311	52.929	170.32	143.424	111.036	144.323	147.376	90856.1	71.396	0.312	31369.3	0.345	90958.4	1442.76	37.853	28619.5	-895.175	46.886	7.182	0.723	1.705	2.426	4.144	0.033	6.088	0.432	0.083	4.079	0.98
0	Train	-295	45	5693231517	4.037	161	4.417	695	109.301	-76.484	-22	-994	1689	72.52	158.757	-1.382	1423641544	0.087	19353.8	0.665	0.593	38.883	65.57	92.108	81.956	72.84	92.225	56430.1	43.599	0.506	14070.4	0.249	56485.5	1452.89	37.809	47142.2	-1457.06	101.686	8.419	0.843	1.888	2.567	4.613	0.02	6.992	0.404	0.061	4.863	0.974
0	Train	-421	42	879754161	4.581	280	2.801	260	152.905	-146.506	-92	-782	1042	115.183	234.042	-0.831	2.03038e+08	0.053	33311.8	0.618	0.502	13.62	27.106	26.539	31.289	24.981	33.413	3697.03	16.754	0.546	2116.95	0.573	3706.71	787.123	27.427	80912.7	-1835.82	164.594	25.402	0.727	3.471	3.326	12.377	0.009	8.181	0.289	0.049	5.382	0.93
0	Train	-361	68	48130188503	4.203	167	5.091	1394	135.819	-73.186	1	-939	2333	82.047	192.908	-1.57	7344083939	0.085	31857.3	0.739	0.52	53.81	103.449	120.554	118.237	98.334	131.745	197258	76.411	0.31	52903.5	0.268	197350	1330.3	35.927	154835	-3737.37	170.086	12.058	0.864	2.315	2.798	6.403	0.015	7.407	0.377	0.048	4.992	0.977
0	Test	-186	64	3333643470	3.31	53	10.463	599	85.259	-18.121	27	-902	1501	32.793	134.357	-2.673	7.48529e+08	0.172	17723.4	0.427	0.337	32.205	95.487	90.041	91.17	65.628	105.729	41404.4	40.778	0.391	14817.6	0.358	41465.6	1408.06	37.301	72492.1	-1920.55	74.733	8.197	0.787	1.573	2.321	5.61	0.055	5.651	0.439	0.142	3.974	0.976
0	Train	-231	63	14968209319	3.323	57	8.354	888	95.537	-24.229	29	-823	1711	39.866	143.602	-2.368	1535333486	0.177	20034.5	0.89	0.533	40.271	75.56	100.758	74.414	135.506	138.642	74406.7	67.263	0.388	22043.4	0.296	74452.8	1111.05	33.011	86038.9	-2340.42	92.642	7.588	0.836	1.558	2.301	4.921	0.06	5.626	0.431	0.158	3.994	0.979
0	Train	-276	62	3149335897	3.923	124	6.057	415	108.871	-51.617	7	-814	1229	62.164	156.045	-1.821	9.38574e+08	0.104	21685.8	0.56	0.241	42.261	175.172	141.04	107.368	145.18	154.88	38426.4	98.153	0.286	19259.7	0.501	38545.1	1049.46	32.101	61493.9	-1765.35	93.003	17.483	0.667	2.539	2.91	10.523	0.024	6.936	0.376	0.072	4.628	0.955
0	Train	-329	52	3868323740	4.293	190	4.451	237	124.52	-89.841	-31	-957	1194	83.699	181.828	-1.345	4.9008e+08	0.071	24990.1	0.473	0.269	25.366	94.153	86.779	62.313	80.893	91.646	14776.5	44.556	0.334	8719.97	0.59	14823.3	1366.22	36.599	72040.7	-1904.99	120.99	14.434	0.778	2.477	2.883	7.619	0.015	7.47	0.351	0.054	5.078	0.955
0	Train	-176	61	1000799536	3.569	86	7.821	550	78.296	-24.211	15	-786	1336	42.109	113.535	-2.067	2.98261e+08	0.13	12303.9	0.587	0.457	33.093	72.491	47.877	83.058	80.412	83.4	23062	42.538	0.447	8773.38	0.38	23138.8	1027.68	31.864	26940.3	-919.225	57.058	7.641	0.753	1.746	2.472	4.403	0.033	6.303	0.421	0.097	4.306	0.971
0	Train	-354	37	2493250342	4.128	190	4.387	136	128.476	-99.043	-27	-830	966	85.799	190.098	-1.425	4.56717e+08	0.088	26327.7	0.775	0.267	20.895	78.166	76.508	51.393	40.733	97.305	12602.2	60.562	0.443	5908.9	0.469	12638.4	1011.02	31.362	75828.2	-2108.95	121.982	12.628	0.802	2.26	2.78	7.055	0.023	7.029	0.374	0.084	4.859	0.95
0	Train	-422	52	9671336414	4.22	215	4.251	205	154.632	-101.849	-7	-889	1094	101.376	220.078	-1.462	1024811557	0.089	38061.2	0.547	0.196	25.508	129.96	98.637	72.06	112.69	114.767	21118.7	71.06	0.321	11505.3	0.545	21158.7	1146.36	33.205	169512	-4074.08	187.276	12.718	0.866	2.196	2.74	7.503	0.023	7.145	0.39	0.076	4.984	0.956
0	Train	-53	62	1091847119	2.758	37	19.03	508	47.967	10.127	33	-743	1251	17.395	87.131	-3.615	2.27418e+08	0.231	7489.31	0.698	0.393	23.381	59.421	57.937	60.24	54.008	73.205	29922	41.501	0.471	9894.23	0.331	29955.4	971.524	31.049	27877.3	-828.789	36.249	6.376	0.694	1.311	2.106	4.559	0.08	4.922	0.443	0.192	3.521	0.976
0	Train	-428	51	6828043438	4.623	310	2.63	690	163.021	-145.862	-90	-864	1554	126.523	240.611	-0.738	1010854865	0.053	36617.9	0.522	0.278	23.62	85.09	51.246	82.901	82.945	91.044	17350.7	44.45	0.229	14154.7	0.816	17460.5	986.308	30.673	108365	-2320.59	192.319	11.667	0.881	2.252	2.785	6.15	0.013	7.749	0.362	0.06	5.419	0.967
0	Train	-153	65	1906147919	3.369	64	10.126	432	73.769	-12.826	24	-821	1253	33.653	112.813	-2.528	5.68076e+08	0.155	12562.2	0.507	0.374	31.563	84.294	58.71	80.171	83.422	87.721	44438.2	42.727	0.301	20149.9	0.453	44636.4	1126.51	33.403	32736.3	-1029.54	52.848	9.934	0.665	1.81	2.499	6.467	0.044	5.948	0.423	0.122	4.07	0.968
0	Train	-274	50	7418896597	3.652	118	6.339	170	107.207	-52.539	11	-857	1027	60.674	153.787	-1.926	4.44562e+08	0.137	20890.2	0.212	0.166	21.305	128.564	137.876	36.299	138.309	138.813	18725.4	27.2	0.128	26701.5	1.426	18797.2	1182.54	34.061	65912	-1940.73	94.927	5.542	0.888	1.437	2.231	3.223	0.049	5.948	0.416	0.134	4.307	0.969
0	Train	-319	61	2056552633	4.219	194	3.644	201	122.34	-78.041	-19	-769	970	85.315	170.468	-1.18	6.129e+08	0.074	22968.9	0.363	0.183	29.938	163.392	110.673	72.956	48.023	119.554	21024.9	59.246	0.356	10356.1	0.493	21091.4	866.169	29.009	49650.1	-1476.17	111.745	13.354	0.779	2.423	2.871	7.062	0.015	7.405	0.364	0.054	5.01	0.946
0	Train	-193	81	797942463	3.788	91	6.741	585	84.545	-18.783	18	-748	1333	45.641	121.473	-1.868	2.37805e+08	0.105	14402.9	0.898	0.689	27.526	39.97	55.895	57.068	45.622	62.667	16081.5	35.879	0.58	5316.02	0.331	16116.2	927.954	30.267	27453.5	-916.761	59.021	11.755	0.648	2.255	2.745	6.376	0.019	6.802	0.384	0.049	4.458	0.962
0	Train	-290	58	7712736804	3.95	189	4.062	630	118.966	-66.829	5	-829	1459	84.457	160.964	-1.289	2298572443	0.103	21443.1	0.875	0.794	50.729	63.862	162.129	74.203	162.028	165.39	88653.7	55.855	0.481	19997	0.226	88716.1	1060.58	32.139	53967.1	-1598.39	116.849	6.271	0.896	1.575	2.37	3.642	0.032	6.613	0.422	0.117	4.75	0.975
0	Train	-80	47	579275825	2.811	39	16.622	158	52.755	-8.499	17	-788	946	18.329	93.56	-3.443	1.79612e+08	0.224	8681.34	0.53	0.43	25.124	58.465	43.296	68.122	60.682	70.83	20470.4	30.988	0.479	7558.74	0.369	20518.8	1065.43	32.541	20829	-671.51	31.942	5.87	0.66	1.226	2.016	4.297	0.08	4.827	0.453	0.159	3.485	0.972
0	Train	-252	57	9609042535	3.583	91	7.785	211	102.688	-40.616	18	-936	1147	52.364	150.217	-2.193	2078788103	0.146	20915.4	0.664	0.416	41.856	100.529	92.777	116.902	98.092	116.914	91950.1	66.754	0.28	35196.3	0.383	92124.2	1418.51	37.369	81457	-2210.4	97.63	9.498	0.812	1.69	2.418	6.41	0.049	6.079	0.411	0.142	4.328	0.968
0	Train	-269	54	401190812	4.094	165	4.164	195	104.566	-70.68	-25	-688	883	72.007	149.119	-1.231	1.0475e+08	0.078	17240.8	0.548	0.119	17.705	149.11	106.847	105.184	100.266	140.792	4622.03	81.65	0.297	4523.06	0.979	4710.71	708.378	26.311	26456.4	-857.571	77.552	13.517	0.688	2.505	2.899	6.761	0.014	7.26	0.355	0.047	4.837	0.939
0	Test	-413	-132	87714566	4.094	162	2.649	-11	88.53	-274.421	-279	-690	679	66.18	294.551	-0.076	2.42927e+07	0.065	11453.1	0.792	0.533	5.655	10.619	10.629	12.036	12.065	12.363	274.09	8.413	0.627	325.662	1.188	279.998	329.111	17.83	7299.9	-33.462	55.301	10.586	0.677	2.476	2.795	4.159	0.008	7.335	0.332	0.018	4.86	0.923
0	Test	-86	59	2698360912	2.96	44	15.288	194	53.359	0.671	26	-707	901	21.533	89.293	-3.179	1.90387e+08	0.2	7972.77	0.549	0.39	23.572	60.377	51.589	62.631	48.085	64.419	23852.6	33.133	0.349	11487.4	0.482	23878.3	895.643	29.802	19098.4	-637.771	33.413	3.513	0.789	1.133	1.959	2.114	0.068	5.05	0.453	0.162	3.641	0.972
0	Train	-489	41	7727309639	4.869	333	2.611	425	176.563	-181.879	-134	-1024	1449	135.522	277.062	-0.671	2909449727	0.042	43683.5	0.62	0.467	51.204	109.727	125.656	128.855	172.315	174.964	37811	68.049	0.341	15990.1	0.423	37901.5	1274.58	34.892	159181	-2743.13	243.759	15.618	0.878	2.777	3.043	7.547	0.006	8.471	0.332	0.028	5.73	0.957
0	Train	-298	65	10459254872	4.107	151	4.874	1204	114.873	-59.644	-2	-944	2148	72.053	160.554	-1.441	4399299783	0.087	22220.2	0.594	0.512	51.253	100.108	103.262	99.727	79.471	124.625	170571	59.451	0.449	33125.2	0.194	170663	1349.9	36.355	70530.4	-1997.75	122.132	9.173	0.859	1.996	2.644	5.045	0.018	7.207	0.402	0.052	4.945	0.978
0	Test	-41	64	465118158	2.883	41	28.102	300	50.383	8.076	30	-972	1272	18.313	100.725	-4.502	5.54464e+08	0.211	10080.2	0.901	0.577	35.611	61.708	110.355	81.841	89.06	111.237	54425.7	55.584	0.457	15190.6	0.279	54651.4	1613.67	40.063	63934	-1391.48	43.294	8.649	0.662	1.377	2.115	6.712	0.07	5.088	0.456	0.173	3.592	0.976
0	Test	-300	59	2678504677	3.963	166	4.664	573	119.312	-60.753	10	-813	1386	77.374	163.439	-1.493	4.95674e+08	0.106	23021.5	0.222	0.207	29.817	144.003	102.935	65.064	71.384	123.188	18507.8	31.922	0.326	10366.2	0.56	18555.9	1045.33	31.98	54638.5	-1663.38	99.539	9.796	0.805	1.933	2.602	5.81	0.033	6.613	0.401	0.109	4.58	0.968
0	Train	-413	35	3938360405	4.704	284	2.159	326	145.401	-174.178	-160	-720	1046	112.951	243.981	-0.307	1045948998	0.042	29189	0.521	0.33	22.648	68.639	45.384	67.862	66.045	67.988	17504.6	35.732	0.306	10654.7	0.609	17571	579.858	23.315	57097.9	-764.55	159.599	15.276	0.822	2.832	3.033	6.721	0.005	8.347	0.317	0.02	5.577	0.941
0	Train	-408	40	4582952180	4.672	262	2.757	492	144.531	-151.957	-114	-824	1316	107.869	230.912	-0.694	1248278356	0.046	30229.7	0.498	0.429	46.574	108.566	141.906	102.284	115.962	149.384	23354.4	54.039	0.407	9707.95	0.416	23410.8	812.692	27.836	74320	-1447.01	164.818	13.529	0.846	2.614	2.939	6.192	0.006	8.2	0.335	0.023	5.552	0.955
0	Train	-477	-49	8330612092	4.714	235	2.699	802	133.728	-250.021	-231	-940	1742	96.921	298.668	-0.391	2384404185	0.043	26691.9	0.624	0.338	34.15	100.958	83.503	137.043	68.018	140.097	26648	62.987	0.349	12350.9	0.463	26730.3	872.623	29.026	51059.8	-609.639	137.052	16.932	0.775	2.968	3.072	7.457	0.004	8.451	0.312	0.011	5.551	0.961
0	Train	-447	-1	20432896724	4.817	231	3.354	339	138.643	-213.106	-197	-1024	1363	96.328	275.862	-0.552	4932474305	0.042	30685.8	0.347	0.25	41.789	167.051	133.347	72.656	147.39	156.351	64741.5	57.896	0.379	20590.1	0.318	64815.8	1138.56	33.201	89015.9	-1043.61	163.802	18.862	0.79	3.101	3.127	8.413	0.004	8.649	0.302	0.009	5.689	0.949
0	Train	-156	72	6254544525	3.512	70	10.62	460	78.027	-10.838	28	-934	1394	36.15	119.634	-2.557	1378614830	0.139	14194.8	0.596	0.379	54.631	143.962	118.945	96.316	126.326	143.291	96185.3	85.866	0.296	34312	0.357	96324	1497.38	38.533	45881.4	-1282.4	59.803	9.547	0.706	1.784	2.484	6.141	0.038	6.135	0.418	0.105	4.207	0.971
0	Train	-121	70	529945526	3.265	61	9.632	205	62.951	-0.001	30	-653	858	30.941	93.878	-2.388	1.57936e+08	0.158	8813.04	0.494	0.418	40.379	96.628	110.624	76.854	63.568	124.072	17842.9	47.713	0.336	9834.08	0.551	17920.7	783.777	27.86	15167.9	-574.822	37.547	7.178	0.667	1.649	2.409	4.362	0.042	5.824	0.434	0.11	3.957	0.959
0	Train	-590	-33	417526919	5.042	304.75	2.57	137	172.717	-294.339	-274	-894	1031	126.095	362.236	-0.445	258023685	0.034	44579.7	0.656	0.338	11.933	35.31	43.594	27.042	44.051	44.714	1921.17	23.164	0.402	1858.04	0.967	1966.41	727.889	26.399	94962.8	-1036.29	187.113	65.22	0.475	6.105	4.016	25.618	0.002	9.326	0.174	0.006	5.717	0.883
0	Train	-170	48	311075197	3.741	93	7.651	414	72.139	-44.881	-20	-702	1116	41.316	112.417	-1.839	5.99277e+07	0.102	10623.4	0.499	0.204	19.787	97.13	82.819	53.786	71.894	92.183	4705.62	48.495	0.369	3676.94	0.781	4742	799.599	28.125	15850.9	-526.137	41.959	7.803	0.657	1.936	2.559	3.782	0.019	6.616	0.389	0.049	4.406	0.961
0	Test	-9	71	1424900714	2.581	39	32.082	1018	29.9	28.79	35	-744	1762	16.591	58.824	-3.338	2.58359e+08	0.224	2631.33	0.631	0.439	36.183	82.513	77.993	91.681	67.909	98.823	74570.2	52.067	0.339	25244.1	0.339	74665.4	1012.01	31.781	3380.82	-112.607	10.245	2.398	0.593	1.013	1.806	1.307	0.067	4.67	0.479	0.145	3.275	0.986
0	Train	-23	57	4403170199	2.583	40	44.288	1180	31.886	12.301	21	-956	2136	16.732	62.268	-4.946	970538416	0.225	3725.93	0.723	0.592	59.978	101.255	124.458	114.684	124.502	139.183	250287	73.166	0.149	128995	0.515	250316	1610.25	40.09	11771.9	-321.034	15.865	3.678	0.616	1.157	1.946	2.271	0.063	4.801	0.48	0.12	3.306	0.987
0	Train	-261	74	2002953099	3.935	116	6.79	945	107.009	-41.372	13	-832	1777	58.72	154.28	-1.916	2.12241e+08	0.1	22090.8	0.941	0.351	13.952	39.714	46.646	48.219	51.892	53.828	8895.29	37.38	0.371	5599.5	0.629	8916.75	1148.35	33.662	59011.4	-1622.89	83.623	23.229	0.526	2.865	2.986	13.934	0.02	6.951	0.369	0.055	4.592	0.964
0	Train	-11	70	4972258956	2.555	41	56.253	994	28.805	27.557	32	-921	1915	17.395	56.281	-4.748	4.19219e+08	0.217	2408.18	0.827	0.639	54.112	84.722	124.323	106.441	128.802	145.272	132268	70.061	0.268	46895.7	0.355	132348	1499.73	38.704	7395.08	-161.305	9.357	2.512	0.538	1.114	1.885	1.205	0.057	4.752	0.48	0.119	3.214	0.986
0	Test	-37	72	931099304	2.954	52	20.06	595	37.962	17.701	26	-745	1340	22.311	60.926	-2.771	2.77489e+08	0.17	3398.66	0.616	0.436	35.099	80.574	66.055	80.983	87.632	90.678	74679.2	49.653	0.394	21761.6	0.291	74754.9	981.097	31.269	6951.41	-229.347	17.587	4.209	0.613	1.397	2.168	2.191	0.038	5.546	0.459	0.084	3.708	0.975
0	Train	-11	57	426123013	2.273	35	24.26	135	22.77	22.02	25	-552	687	14.583	40.512	-2.843	9.13221e+07	0.259	1156.34	0.679	0.418	29.276	70.109	82.827	78.871	61.895	84.708	55610.4	47.584	0.421	16721.5	0.301	55643.2	597.696	24.429	645.97	-33.957	5.496	1.842	0.495	0.912	1.698	0.977	0.081	4.283	0.491	0.151	3.012	0.971
0	Train	-13	63	267342663	2.442	37	22.682	461	26.218	24.689	30	-691	1152	15.851	47.098	-2.855	5.20164e+07	0.238	1608.69	0.684	0.53	26.451	49.878	54.41	42.743	63.031	64.88	23398.3	34.096	0.437	9046.53	0.387	23449.4	876.664	29.586	1291.4	-56.605	7.261	1.958	0.562	0.931	1.724	1.045	0.075	4.45	0.485	0.159	3.166	0.981
0	Test	-42	56	413280913	2.688	40	23.511	667	36.626	10.445	24	-693	1360	17.56	63.239	-3.648	1.23167e+08	0.221	3890.03	0.532	0.451	27.466	60.918	46.897	68.69	71.284	78.84	30729.4	32.398	0.419	11334.3	0.369	30798.6	850.481	29.111	6131.86	-226.874	15.566	3.395	0.617	1.144	1.969	2.039	0.069	4.823	0.476	0.151	3.354	0.98
0	Train	-21	75	3839347440	2.786	44	36.621	456	35.744	26.325	37	-1024	1480	19.007	66.656	-4.224	3.62543e+08	0.199	3750.07	0.917	0.642	54.983	85.635	182.019	112.327	109.298	182.311	81524.9	78.5	0.285	31904.7	0.391	81597.4	1826.1	42.694	9601.4	-273.306	16.433	3.192	0.654	1.175	1.975	1.728	0.055	5.067	0.47	0.122	3.485	0.981
0	Train	-55	61	979685880	2.943	49	18.926	201	41.726	7.999	23	-726	927	21.405	67.875	-3.165	177633666	0.184	4542.97	0.434	0.332	35.17	105.974	95.498	62.955	90.719	104.742	38470.4	45.988	0.332	16601.6	0.432	38557.8	966.038	31.016	8874.55	-299.737	20.422	4.16	0.648	1.234	2.062	2.527	0.055	5.235	0.45	0.129	3.684	0.971
0	Train	-204	58	91174162	3.738	88	8.984	132	84.316	-43.104	-8	-712	844	41.248	135.676	-2.337	1.82705e+07	0.106	16549.9	0.486	0.171	26.975	157.82	59.859	79.828	23.582	102.571	967.723	76.715	0.31	1524.36	1.575	992.538	826.933	28.542	39794.5	-1096.42	53.612	5.435	0.757	1.538	2.307	2.995	0.026	6.052	0.442	0.059	4.247	0.96
0	Test	-447	17	3387257486	4.644	292	2.425	128	152.257	-185.909	-157	-739	867	118.339	258.354	-0.583	1.98679e+08	0.047	32184.4	0.321	0.196	12.438	63.469	39.006	51.232	25.932	51.237	2961.71	20.388	0.357	2792.97	0.943	2976.61	614.033	24.019	67804.8	-1282.34	161.578	14.027	0.832	2.44	2.817	7.174	0.009	7.856	0.352	0.042	5.46	0.941
0	Test	-122	55	1897879995	3.349	71	12.32	339	58.939	-15.517	9	-895	1234	32.904	87.49	-2.432	4.99774e+08	0.14	7413.66	0.808	0.38	40.434	106.358	127.074	98.402	134.056	146.133	65074.2	85.954	0.301	26002.1	0.4	65292.1	1313.06	36.139	16665.3	-516.468	34.548	6.586	0.671	1.6	2.355	3.894	0.035	5.992	0.437	0.082	4.086	0.97
0	Train	-6	60	873900080	2.271	33	32.945	547	23.082	26.274	30	-727	1274	14.054	44.951	-3.483	1.65021e+08	0.265	1330.28	0.68	0.49	38.167	77.854	80.839	85.879	78.651	91.303	81594.7	52.974	0.387	23482.6	0.288	81669.4	1000.29	31.61	1235.28	-53.27	6.203	1.862	0.531	0.883	1.672	1.044	0.087	4.217	0.486	0.18	2.997	0.984
0	Train	-115	42	50056037	3.15	62	10.56	126	51.461	-20.297	1	-587	713	28.904	77.213	-2.287	1.49178e+07	0.158	5549.93	0.511	0.376	11.609	30.884	33.877	23.187	24.492	35.455	2480.84	15.784	0.514	1724.59	0.695	2502.2	585.748	24.127	4405.28	-199.944	19.939	5.519	0.545	1.507	2.305	3.158	0.044	5.51	0.439	0.114	3.768	0.955
0	Train	-23	64	802673522	2.635	39	18.168	330	32.48	19.844	30	-624	954	16.917	56.686	-3.072	1.50051e+08	0.222	2819.49	0.713	0.638	36.146	56.644	76.821	80.68	53.921	82.783	46658.3	40.391	0.458	13688.5	0.293	46697.5	702.137	26.456	2479.95	-117.114	11.445	2.564	0.622	1.031	1.845	1.441	0.07	4.699	0.475	0.156	3.309	0.975
0	Train	-98	54	792675352	2.871	40	15.799	641	58.836	-4.775	26	-789	1430	21.275	99.762	-3.267	1.86282e+08	0.224	9929.69	0.642	0.297	21.75	73.352	46.593	99.783	66.613	99.798	18661.9	47.114	0.375	9075.75	0.486	18717.2	1076.45	32.697	25800.4	-790.842	37.095	7.8	0.629	1.434	2.198	5.624	0.082	4.947	0.433	0.203	3.532	0.977
0	Test	-235	55	1965918024	3.734	138	4.791	390	95.512	-45.777	7	-777	1167	63.028	129.59	-1.485	4.21314e+08	0.114	14698.2	0.803	0.61	26.416	43.27	51.15	46.635	44.233	51.21	25063.6	34.752	0.529	7824.1	0.312	25087.7	980.932	31.044	25104.7	-926.561	73.834	5.256	0.862	1.498	2.285	2.849	0.033	6.297	0.432	0.101	4.491	0.971
0	Train	-106	67	409732870	3.344	64	9.652	472	56.419	-3.282	18	-607	1079	29.915	83.764	-2.173	1.2211e+08	0.141	7005.68	0.397	0.142	20.502	144.487	62.661	60.954	121.409	131.852	17316.8	57.291	0.338	9572.01	0.553	17403.3	666.417	25.692	9726.73	-382.556	30.607	5.297	0.692	1.525	2.295	2.87	0.034	5.944	0.444	0.083	4.04	0.968
0	Test	-93	68	2237951438	3.015	45	14.214	739	60.213	5.054	35	-825	1564	22.658	101.098	-3.087	2.05987e+08	0.197	10195.3	0.88	0.371	20.225	54.525	53.441	61.031	62.226	66.458	20099.1	47.987	0.335	10658.9	0.53	20153.7	1167.81	34.039	30287.7	-940.807	43.331	6.855	0.708	1.425	2.191	4.661	0.064	5.241	0.446	0.151	3.703	0.979
0	Train	-117	53	913043260	3.058	48	11.018	463	56.95	-8.829	18	-687	1150	24.838	89.769	-2.627	1.45802e+08	0.186	7980.55	0.769	0.533	22.545	42.325	53.056	47.622	47.826	57.382	18067.8	32.534	0.45	7395.44	0.409	18093	819.168	28.496	13500	-520.79	32.378	3.956	0.763	1.207	2.041	2.401	0.062	5.177	0.453	0.134	3.707	0.976
0	Train	-41	59	2054364572	2.733	39	26.671	1282	41.384	10.711	28	-933	2215	17.193	76.497	-3.44	4.40269e+08	0.224	5737	0.707	0.572	40.203	70.306	102.037	105.995	65.845	106.263	75125	49.731	0.181	47696.1	0.635	75237.5	1532.34	39.068	22162.1	-588.775	27.36	3.182	0.79	1.077	1.903	1.964	0.072	4.855	0.473	0.167	3.449	0.988
0	Train	-68	46	686955977	2.769	42	19.792	287	40.112	-0.529	16	-842	1129	19.62	64.737	-3.236	1.3632e+08	0.216	4190.65	0.78	0.377	26.302	69.778	73.683	82.62	70.384	86.904	32368.2	54.449	0.293	16776.4	0.518	32527.5	1210.49	34.751	5627.78	-208.682	16.033	4.588	0.536	1.209	2.063	3.041	0.077	4.842	0.438	0.154	3.434	0.976
0	Test	-313	45	9234438867	4.15	211	3.129	462	118.357	-96.1	-50	-729	1191	87.998	172.023	-0.962	5.77152e+08	0.074	20356.8	0.478	0.409	45.943	112.407	88.947	68.078	97.305	97.305	19468.1	53.678	0.304	11530.1	0.592	19503.6	764.142	27.182	38270.7	-1128.97	107.508	6.76	0.876	1.69	2.385	3.411	0.023	6.799	0.371	0.101	4.974	0.968
1	Train	-198	56	9586073945	3.716	91	9.312	540	84.207	-36.217	4	-1024	1564	44.25	127.45	-2.243	2112944220	0.117	14931.8	0.925	0.581	68.419	117.663	145.106	119.197	148.812	163.633	129776	108.812	0.255	48591.7	0.374	130080	1652.44	40.469	48644.9	-1317.88	67.974	9.137	0.75	1.831	2.526	5.533	0.029	6.489	0.41	0.079	4.467	0.973
1	Train	-221	73	100000000000	3.701	78	8.877	779	95.1	-28.216	19	-937	1716	42.792	146.092	-2.386	3792421383	0.121	20546.8	0.552	0.305	56.359	184.864	156.01	114.922	146.086	158.36	177640	102.113	0.248	61685.2	0.347	177690	1444.58	37.706	103829	-2604.02	101.681	10.378	0.804	1.933	2.497	6.056	0.028	6.466	0.404	0.073	4.453	0.974
1	Test	-488	-19	12777950179	4.836	270	2.467	888	147.059	-249.803	-244	-890	1778	109.532	306.276	-0.154	3808122188	0.038	31403.4	0.623	0.556	62.809	113.061	103.207	104.817	134.345	134.373	40416.6	70.416	0.239	23865.1	0.59	40596.1	777.641	27.21	69610.8	-451.311	168.662	20.038	0.785	3.329	3.201	8.147	0.003	8.745	0.282	0.006	5.707	0.957
1	Train	-117	59	5052340164	3.183	47	15.025	487	68.642	-11.215	22	-977	1464	24.356	117.896	-3.217	1505713233	0.183	13773.7	0.511	0.471	60.741	129.034	118.008	88.346	102.805	125.882	108163	65.947	0.331	33126.1	0.306	108329	1644.13	40.378	73013.8	-1756.6	62.435	7.665	0.772	1.502	2.268	5.311	0.057	5.584	0.445	0.138	3.911	0.977
1	Train	-475	57	7794143177	4.786	285	4.684	416	181.723	-148.391	-61	-1024	1440	123.132	274.625	-1.401	2322833409	0.051	53398.9	0.293	0.211	31.016	147.303	104.762	110.699	66.467	122.191	30715.3	43.162	0.402	11803.5	0.384	30799.2	1355.49	35.873	491454	-8251.86	310.143	35.798	0.794	3.88	3.459	19.587	0.007	8.686	0.297	0.027	5.669	0.942
1	Test	-386	44	3330776671	4.321	230	3.776	369	141.847	-111.969	-40	-891	1260	100.2	207.826	-1.225	754793421	0.073	30654.8	0.675	0.584	95.908	164.123	136.379	116.408	146.097	146.097	17300.2	110.8	0.241	13400.7	0.775	17475.4	1124.9	33.099	83087.2	-2185.95	136.845	20.257	0.729	2.864	3.092	11.439	0.019	7.482	0.336	0.076	5.035	0.95
1	Train	-285	72	14298195519	3.952	113	6.489	832	113.615	-43.758	16	-915	1747	60.291	163.827	-1.925	3360142912	0.106	24924.5	0.554	0.402	43.742	108.831	75.828	105.265	109.499	112.785	125087	60.257	0.363	33358.3	0.267	125195	1332.76	36.086	125221	-3139.54	132.281	9.999	0.856	1.998	2.628	5.728	0.024	6.918	0.403	0.075	4.745	0.974
1	Train	-280	63	2585860000	4.208	160	4.409	492	110.107	-64.309	-15	-770	1262	72.026	155.441	-1.256	5.43767e+08	0.076	20026.3	0.603	0.25	30.508	122.11	115.242	89.933	101.035	119.01	22441.8	73.676	0.288	13355.4	0.595	22505.1	888.459	29.448	44836.5	-1272.56	97.117	12.214	0.768	2.346	2.824	6.275	0.015	7.415	0.365	0.048	4.99	0.958
1	Train	-174	78	3864307815	3.771	89	8.661	597	82.658	-18.828	17	-845	1442	42.609	123.016	-2.18	8.67683e+08	0.108	14778.5	0.52	0.417	57.059	136.921	125.949	97.168	131.48	136.719	57223.5	71.23	0.284	25302.5	0.442	57337.3	1180.29	34.145	42851.1	-1243.83	66.374	8.814	0.752	1.985	2.608	4.651	0.021	6.74	0.4	0.056	4.499	0.968
1	Test	-34	62	3959065377	2.781	40	21.986	1283	42.379	10.954	28	-813	2096	17.579	79.052	-3.75	1261387250	0.215	6129.23	0.471	0.249	42.993	172.82	165.368	100.128	166.437	167.347	201726	81.476	0.381	43662	0.216	201847	1168.91	34.095	19895.1	-611.469	28.655	2.925	0.81	1.07	1.902	1.751	0.066	4.953	0.479	0.152	3.511	0.988
1	Test	-297	53	15501766820	4.058	155	5.142	345	114.615	-68.405	-7	-979	1324	72.125	164.169	-1.57	4328940183	0.092	22272.3	0.481	0.355	62.214	175.176	146.312	94.394	141.776	150.859	160458	84.317	0.278	51430.1	0.321	160619	1494.42	38.35	63840.3	-1817.25	105.546	11.134	0.8	2.146	2.724	6.214	0.022	7.06	0.389	0.069	4.797	0.964
1	Train	-297	57	12431127014	4	143	6.429	1062	115.918	-64.178	-1	-1009	2071	68.692	168.381	-1.814	1878105584	0.098	24233.4	0.655	0.491	63.319	129.021	122.712	86.567	116.717	128.925	66096.9	84.571	0.211	37481.9	0.567	66242.2	1582.8	39.482	103170	-2492.37	115.025	19.472	0.701	2.654	2.944	11.658	0.022	7.074	0.367	0.069	4.772	0.971
1	Train	-227	91	12248695545	3.958	103	6.282	319	96.217	-22.58	19	-836	1155	52.1	137.373	-1.821	1436411494	0.093	18361.4	0.518	0.328	46.623	142.34	129.626	92.209	130.221	136.194	75997.7	73.711	0.254	34221.3	0.45	76116.5	1177.87	34.042	53433.9	-1596.02	86.087	10.19	0.779	2.261	2.741	4.832	0.015	7.119	0.368	0.039	4.65	0.956
1	Train	-344	57	218509796	4.465	194	3.864	222	126.041	-102.627	-54	-730	952	84.952	190.171	-1.132	6.51209e+07	0.058	25632.9	0.444	0.246	7.679	31.162	34.203	17.332	34.378	34.378	1786.75	13.821	0.536	1327.27	0.743	1800.65	762.507	27.136	63009.3	-1641.5	121.295	17.171	0.745	2.93	3.093	8.058	0.008	7.925	0.321	0.022	5.221	0.934
1	Test	-146	68	3689417568	3.443	64	11.094	830	72.29	-12.2	21	-915	1745	32.731	113.132	-2.579	1099531044	0.142	12650	0.56	0.312	42.707	136.925	112.858	88.444	105.769	134.58	85756.7	76.675	0.307	30663.1	0.358	85908.4	1402.24	37.288	40763.1	-1194.12	57.944	10.608	0.68	1.974	2.6	6.534	0.032	6.266	0.417	0.081	4.175	0.974
1	Test	-239	59	1733115052	3.635	104	6.051	242	95.811	-38.031	15	-729	971	53.773	134.95	-1.86	3.11029e+08	0.13	16765.2	0.515	0.273	34.456	126.327	105.677	73.538	80.788	116.311	16998.6	65.103	0.28	11413.9	0.671	17078.7	892.545	29.617	38253.7	-1258.62	71.802	10.622	0.726	1.983	2.616	6.422	0.037	6.261	0.405	0.108	4.324	0.956
1	Train	-295	37	1661930934	4.102	162	4.59	838	107.436	-87.658	-39	-808	1646	71.399	163.057	-1.302	4.67945e+08	0.08	18903.5	0.346	0.185	28.926	156.607	126.776	69.812	129.569	132.011	17527.2	54.173	0.327	9966.82	0.569	17600.2	948.298	30.502	39171.9	-1166.73	87.785	16.383	0.675	2.66	2.974	8.686	0.015	7.354	0.352	0.053	4.872	0.964
1	Train	-114	62	1096102873	3.125	48	18.203	159	65.404	-6.311	26	-972	1131	24.824	111.255	-3.457	2.7409e+08	0.184	12337.8	0.466	0.279	35.822	128.396	117.669	73.485	84.765	118.994	22080.1	59.776	0.407	9342.82	0.423	22143.9	1578.7	39.578	82975.3	-1750.04	57.573	8.395	0.738	1.553	2.303	5.872	0.055	5.509	0.442	0.139	3.837	0.969
1	Train	-340	52	12137650985	4.15	182	4.42	650	127.35	-83.103	-12	-866	1516	83.615	182.055	-1.441	2904027824	0.085	26237.8	0.747	0.452	47.347	104.644	131.542	110.744	114.696	135.06	87473.1	78.177	0.271	35189.4	0.402	87618.8	1101.49	32.741	84651.5	-2314.16	130.769	12.859	0.815	2.329	2.823	7.069	0.019	7.249	0.377	0.06	4.934	0.965
1	Train	-160	58	5536895268	3.39	64	10.9	1191	74.141	-20.17	17	-868	2059	33.668	115.45	-2.565	1650121767	0.151	12921.8	0.636	0.491	65.745	133.836	142.437	120.087	151.669	152.388	123577	85.164	0.31	38651.9	0.313	123803	1238.75	35.011	42903.3	-1252.59	59.413	7.494	0.767	1.678	2.419	4.546	0.039	6.027	0.434	0.099	4.108	0.981
1	Train	-208	56	10611736248	3.61	80	7.613	801	84.045	-33.995	8	-922	1723	43.234	124.514	-2.079	2653555988	0.129	14348.1	0.729	0.674	69.453	103.009	167.618	110.013	141.942	168.405	170950	75.076	0.319	46735.5	0.273	171155	1347.18	36.489	40061.5	-1270.52	69.524	6.592	0.82	1.653	2.397	3.715	0.031	6.325	0.432	0.079	4.347	0.978
1	Train	-77	54	9053933284	2.793	35	17.618	324	60.07	-5.441	25	-871	1195	17.224	110.774	-3.646	1207759831	0.236	12241.4	0.439	0.304	51.458	169.112	135.397	111.454	132.104	143.938	98303.5	74.169	0.279	36922.9	0.376	98424.2	1281.42	35.633	59408.4	-1507.21	51.788	4.907	0.811	1.139	1.959	3.532	0.089	4.774	0.441	0.194	3.486	0.978
1	Train	-259	57	300821890	3.922	163	4.127	413	105.372	-56.359	1	-670	1083	71.923	143.194	-1.283	5.12394e+07	0.098	17328.1	0.303	0.179	11.868	66.122	72.146	27.017	69.065	75.977	2481.32	20.056	0.508	1745.19	0.703	2498.93	697.883	26.15	23568.6	-838.011	69.183	13.565	0.642	2.368	2.804	7.278	0.028	6.66	0.365	0.093	4.538	0.952
1	Test	-376	39	2425447428	4.398	219	3.603	254	133.406	-119.821	-63	-836	1090	93.836	204.017	-1.129	5.64868e+08	0.062	27265.7	0.722	0.564	28.998	51.417	50.502	50.056	60.004	62.497	13522.7	37.127	0.364	7540.07	0.558	13571.1	960.413	30.471	79899.7	-2102.92	139.079	11.899	0.837	2.369	2.834	5.896	0.011	7.612	0.36	0.039	5.177	0.952
1	Train	-172	59	1542978163	3.368	73	7.638	769	74.27	-19.281	19	-649	1418	38.837	106.916	-2.105	3.03194e+08	0.152	11059.3	0.61	0.418	36.258	86.642	89.75	94.6	67.464	101.042	26469.8	52.893	0.3	14293.7	0.54	26523.7	697.309	26.211	20063.2	-744.827	47.433	6.48	0.745	1.561	2.354	3.913	0.047	5.779	0.426	0.129	4.053	0.974
1	Test	-550	21	39346151692	4.945	361	1.896	601	181.119	-272.565	-284	-827	1428	144.159	344.234	0.011	2510633677	0.034	44205.7	0.72	0.515	40.999	79.673	102.352	88.102	77.412	106.182	21137.6	57.384	0.242	15268.6	0.722	21187.3	659.6	24.515	120253	-224.313	250.559	17.137	0.87	2.906	2.992	7.429	0.004	8.534	0.32	0.019	5.848	0.955
1	Train	-115	62	2025163334	3.257	62	8.972	548	57.46	-5.992	19	-660	1208	29.551	85.167	-2.216	3.70972e+08	0.152	7217.52	0.668	0.465	37.461	80.615	116.602	73.858	108.035	117.429	51084.9	53.837	0.375	17768.3	0.348	51144.4	763.573	27.501	11196	-456.864	33.962	4.826	0.741	1.429	2.213	2.646	0.039	5.777	0.447	0.097	4.004	0.973
1	Test	-313	50	9273652401	3.982	178	4.275	167	119.775	-75.222	-6	-831	998	80.65	168.201	-1.409	733560395	0.098	22633.1	0.536	0.307	36.575	119.278	101.242	78.612	120.533	121.253	25866.1	63.922	0.277	15291.3	0.591	25928.6	1073.22	32.422	50016.6	-1547.93	98.986	11.591	0.774	2.093	2.681	6.76	0.031	6.649	0.38	0.107	4.665	0.955
1	Train	-323	53	1098570371	4.446	193	3.99	387	121.281	-98.033	-55	-798	1185	82.657	182.271	-1.084	3.06781e+08	0.059	23612.2	0.809	0.587	68.337	116.505	111.833	102.373	117.816	137.622	9120.93	94.243	0.261	8084.28	0.886	9234.11	895.734	29.578	45888.4	-1180.4	101.062	18.314	0.679	2.99	3.144	8.91	0.009	7.924	0.315	0.031	5.147	0.944
1	Train	-388	50	1607477051	4.536	262	2.841	204	143.367	-130.479	-85	-794	998	107.612	215.818	-0.821	3.44497e+08	0.053	29552.6	0.403	0.155	22.975	148.429	104.667	82.258	65.61	115.699	7337.27	59.822	0.289	6319.03	0.861	7396.24	836.434	28.321	71001.6	-1735.45	150.224	14.082	0.823	2.631	2.972	6.775	0.009	7.869	0.339	0.042	5.305	0.943
1	Train	-240	55	16837059845	3.705	91	7.756	781	95.163	-43.34	6	-893	1674	48.842	142.103	-2.135	3440149320	0.123	18314.9	0.591	0.567	81.943	144.545	148.282	119.549	130.995	151.603	170141	85.357	0.231	64224.4	0.377	170361	1261.17	35.233	67308.1	-1860.45	86.725	7.755	0.826	1.704	2.429	4.66	0.031	6.388	0.428	0.08	4.446	0.976
1	Test	-241	74	15271973107	3.713	123	6.243	1091	104.141	-28.555	33	-842	1933	61.024	142.883	-1.86	3653938878	0.128	19600.2	0.53	0.499	78.465	157.379	139.061	112.301	140.287	145.604	178689	83.451	0.233	65935.4	0.369	178978	1164.67	33.81	60338	-1781.08	94.822	8.835	0.821	1.755	2.483	5.529	0.04	6.342	0.411	0.124	4.476	0.979
1	Train	-120	63	4610796325	3.201	54	11.877	885	62.182	-5.073	24	-905	1790	27.159	98.559	-2.639	1298248614	0.169	9688.08	0.449	0.386	57.639	149.26	132.686	90.948	126.948	134.891	133490	66.956	0.281	44988.5	0.337	133650	1423.51	37.622	22193.5	-734.522	40.616	8.376	0.641	1.704	2.418	5.324	0.045	5.731	0.439	0.112	3.891	0.978
1	Train	-237	54	4504868659	3.6	100	6.592	212	94.841	-40.355	13	-770	982	52.501	135.648	-1.953	7.35183e+08	0.136	16771.8	0.656	0.353	38.911	110.305	122.9	87.255	120.418	124.067	39845.2	72.351	0.309	18246.4	0.458	39954.8	945.774	30.474	44678.1	-1410.7	75.749	7.675	0.802	1.639	2.388	4.742	0.044	6.057	0.419	0.123	4.278	0.963
1	Train	-393	42	8129816374	4.512	252	3.093	434	142.869	-130.613	-77	-859	1293	105.692	216.384	-0.919	1042646644	0.056	29762	0.429	0.273	31.959	117.112	105.482	64.249	106.091	114.116	22219	50.253	0.297	12880.7	0.58	22268.4	1010.75	31.301	70597.2	-1754.02	141.078	18.009	0.762	2.856	3.043	8.875	0.011	7.825	0.326	0.046	5.26	0.952
1	Train	-322	71	3455397399	4.39	173	5.252	317	126.71	-76.304	-18	-932	1249	78.548	184.014	-1.525	1029787667	0.067	28038.8	0.759	0.354	39.667	112.168	108.914	83.309	112.238	118.52	30251.8	85.147	0.274	17108.5	0.566	30412	1353.74	36.447	87589.5	-2133.93	117.281	16.495	0.738	2.71	3.018	8.768	0.011	7.691	0.344	0.036	5.077	0.952
1	Train	-438	64	27763404622	4.628	270	3.157	1264	162.711	-121.409	-42	-950	2214	116.735	231.91	-1.02	7064265332	0.055	39042.1	0.528	0.241	41.362	171.863	157.922	114.028	150.479	159.136	131060	90.772	0.23	54155.8	0.413	131349	1237.1	34.515	137091	-3189.57	197.619	15.347	0.85	2.689	2.994	7.702	0.009	8.062	0.344	0.031	5.402	0.972
1	Test	-212	61	3836340840	3.708	103	6.581	247	87.486	-34.685	10	-835	1082	50.093	124.8	-1.876	7.39059e+08	0.115	14371.9	0.521	0.256	39.057	152.781	128.592	85.419	132.306	134.795	47350.2	79.548	0.284	22302.1	0.471	47451.8	1140.73	33.55	32349.6	-1081.84	67.487	7.213	0.796	1.69	2.425	4.142	0.029	6.408	0.421	0.088	4.459	0.965
1	Train	-440	47	36722168747	4.564	274	3.217	1118	161.076	-133.873	-58	-962	2080	117.739	236.388	-1.008	8629881643	0.06	37957.5	0.534	0.273	48.944	179.125	154.79	98.707	155.681	160.557	154217	95.693	0.246	56521.3	0.367	154438	1248.25	34.643	144899	-3224.21	206.937	14.586	0.865	2.553	2.938	7.547	0.012	7.904	0.349	0.05	5.416	0.971
1	Test	-245	56	2503695038	3.946	130	5.732	330	98.609	-52.19	-3	-754	1084	59.788	141.316	-1.651	7.46159e+08	0.097	17246.3	0.489	0.439	57.771	131.45	121.771	95.061	120.811	123.258	37177.3	64.287	0.259	20801.9	0.56	37363.7	918.464	30.034	37128.5	-1160.77	75.95	10.398	0.748	2.091	2.717	5.808	0.022	6.909	0.382	0.067	4.664	0.958
1	Train	-143	69	4848923755	3.531	70	10.344	1168	69.628	-12.374	17	-1024	2192	34.123	106.675	-2.306	1266037903	0.13	11226.4	0.406	0.341	61.406	179.905	142.742	97.821	142.603	160.136	111147	72.996	0.278	40233	0.362	111256	1712.04	41.23	33486.2	-988.815	55.002	6.394	0.785	1.657	2.387	3.516	0.028	6.309	0.434	0.071	4.301	0.982
1	Train	-304	66	255304979	4.194	187	4.123	169	120.329	-70.659	-11	-762	931	81.544	167.085	-1.303	6.60908e+07	0.076	22924.8	0.466	0.164	24.645	150.733	18.291	110.833	28.655	112.605	2341.35	70.184	0.421	2025.57	0.865	2367.37	901.54	29.73	40758.3	-1258.68	92.734	22.525	0.597	3.079	3.164	12.298	0.015	7.381	0.332	0.06	4.869	0.931
1	Train	-187	55	2138739824	3.394	67	9.1	172	80.709	-26.712	16	-779	951	37.295	122.759	-2.414	6.37394e+08	0.154	14356.3	0.839	0.322	38.76	120.555	102.925	104.49	113.92	117.569	42146	101.199	0.302	19370.1	0.46	42296	1033.37	31.952	37657.1	-1187.72	59.019	9.358	0.708	1.784	2.489	6.011	0.044	5.91	0.424	0.113	4.074	0.959
1	Train	-275	48	7201025473	3.991	169	3.749	353	105.378	-70.377	-18	-771	1124	73.959	147.879	-1.191	1200733783	0.087	16915.3	0.372	0.222	30.711	138.647	116.24	75.796	100.29	120.733	54847.1	51.567	0.37	18871.4	0.344	54907.6	864.46	29.043	31355.7	-1056.05	90.523	6.673	0.859	1.737	2.446	3.388	0.021	6.834	0.407	0.068	4.82	0.965
1	Test	-293	46	2119199899	3.836	145	5.052	153	111.059	-66.419	-2	-743	896	69.093	158.714	-1.631	5.07035e+08	0.112	20778.6	0.336	0.294	25.965	88.188	69.777	73.869	40.558	75.616	20074.6	29.629	0.371	9641.02	0.48	20128.3	833.311	28.49	54486.4	-1696.31	97.225	11.03	0.785	2.08	2.684	6.4	0.031	6.597	0.394	0.084	4.532	0.95
1	Train	-135	71	2232405153	3.397	59	11.103	621	71.326	-5.827	28	-827	1448	30.761	111.971	-2.633	665307931	0.153	12503.5	0.644	0.319	33.753	105.796	96.264	78.834	101.789	104.721	52944.2	68.133	0.357	19087.8	0.361	53065.7	1208.29	34.576	42679.4	-1233.28	58.089	7.057	0.775	1.601	2.376	4.36	0.042	6.001	0.429	0.12	4.156	0.975
1	Train	-198	70	1666639054	3.604	87	8.527	342	89.049	-22.164	25	-804	1146	45.221	130.295	-2.267	2.32382e+08	0.132	16485.7	0.634	0.279	28.567	102.248	73.436	78.761	99.258	113.098	13644	64.875	0.364	7583.02	0.556	13688.1	1116.78	33.191	49824.6	-1427.77	69.382	9.238	0.746	1.787	2.489	5.789	0.038	6.171	0.41	0.107	4.303	0.966
1	Train	-170	64	8466386346	3.371	57	10.422	583	78.127	-17.715	21	-882	1465	31.979	123.712	-2.639	2286770249	0.155	14990.9	0.59	0.527	52.054	98.832	150.802	108.025	135.579	152.047	149315	58.296	0.364	37375.5	0.25	149416	1310.93	35.959	68336.9	-1904.57	78.987	7.464	0.823	1.687	2.4	4.458	0.037	6.074	0.439	0.091	4.139	0.974
1	Train	-348	53	13459513537	4.211	211	3.658	782	132.476	-90.202	-17	-796	1578	93.066	186.038	-1.209	2541592229	0.08	26473.8	0.75	0.473	55.647	117.722	131.136	95.128	138.909	141.489	73344.6	88.282	0.308	27551	0.376	73434.8	874.937	28.978	80313.1	-2162.91	151.589	10.851	0.865	2.183	2.724	5.674	0.016	7.379	0.382	0.057	5.112	0.968
1	Test	-17	60	2346138337	2.556	38	28.392	555	30.317	17.964	25	-700	1255	15.917	56.716	-4.006	6.12569e+08	0.231	2893.96	0.824	0.599	72.325	120.686	143.871	111.975	141.164	158.109	190260	99.456	0.301	53156	0.279	190436	863.314	29.343	4269.54	-162.298	11.78	2.466	0.637	1.052	1.854	1.323	0.067	4.685	0.488	0.133	3.238	0.98
1	Test	-450	18	12371725462	4.711	253	2.897	129	144.81	-194.647	-165	-908	1037	105.749	263.304	-0.689	7645490741	0.043	31441.9	0.773	0.465	37.445	80.572	130.951	137.098	75.284	137.746	110129	62.244	0.471	23573.2	0.214	110278	956.147	30.315	77447.2	-1326.67	163.287	14.961	0.83	2.739	3.033	7.231	0.005	8.272	0.332	0.021	5.557	0.943
1	Train	-147	54	1940870450	3.117	51	9.315	355	65.305	-13.003	21	-706	1061	28.917	99.232	-2.444	3.96559e+08	0.186	9677.92	0.555	0.446	46.753	104.811	111.686	89.127	109.065	133.799	40207.3	58.172	0.351	16192.5	0.403	40272.1	866.92	29.265	23654.5	-853.352	47.142	5.337	0.788	1.354	2.174	3.367	0.061	5.411	0.44	0.151	3.848	0.972
1	Train	-178	55	3224744303	3.4	69	7.894	391	74.673	-23.905	14	-733	1124	37.207	110.119	-2.157	7.37484e+08	0.15	11554.8	0.37	0.323	36.793	113.992	108.397	70.529	117.331	119.439	60765.7	42.209	0.414	18049.6	0.297	60817	901.64	29.801	29370.5	-1021.85	59.014	4.897	0.841	1.401	2.201	2.803	0.042	5.885	0.449	0.102	4.151	0.972
1	Train	-259	59	3029123919	3.805	132	5.893	515	104.471	-48.871	10	-821	1336	63.444	146.84	-1.76	7.64088e+08	0.113	19173.7	0.646	0.362	44.223	122.298	120.601	80.235	130.293	131.411	35327.8	79.028	0.263	19785.4	0.56	35436.7	1054.03	32.193	47702.7	-1457.59	84.379	14.017	0.702	2.295	2.811	8.419	0.031	6.651	0.381	0.103	4.511	0.962
1	Train	-228	58	1378791615	3.703	109	7.058	631	94.098	-39.395	12	-849	1480	53.128	135.368	-1.954	3.69289e+08	0.121	16772.6	0.497	0.345	48.545	140.74	108.593	82.22	117.276	126.754	20060.2	69.942	0.309	11560.9	0.576	20152.7	1139.41	33.541	38678.3	-1208.47	69.156	11.648	0.697	2.093	2.708	7.056	0.033	6.472	0.392	0.103	4.378	0.968
1	Train	-174	75	10849799688	3.667	76	9.533	1045	80.442	-18.826	16	-955	2000	37.861	124.604	-2.377	3233489124	0.117	15171.6	0.923	0.709	67.964	95.9	147.045	118.29	124.438	152.101	208111	88.514	0.349	48723.4	0.234	208262	1539.29	39.027	59869.2	-1645.89	74.163	9.477	0.767	2.067	2.647	5.042	0.021	6.686	0.395	0.05	4.392	0.976
1	Test	-413	41	90361517160	4.074	267	2.963	335	154.92	-114.723	-16	-827	1162	116.668	216.2	-1.065	3621523627	0.104	33580.9	0.53	0.436	62.258	142.782	135.47	92.041	119.163	140.855	77408.7	75.705	0.224	39214.1	0.507	77478.4	985.082	30.723	100007	-2695.3	172.864	8.882	0.896	1.724	2.42	5.4	0.044	6.553	0.374	0.146	4.803	0.967
1	Train	-342	59	3105460193	4.183	223	3.171	296	132.977	-85.368	-13	-748	1044	97.067	181.5	-1.079	9.25498e+08	0.08	25654.4	0.616	0.407	33.392	82.098	117.082	93.618	50.802	120.098	28036.5	50.605	0.409	10898.9	0.389	28094.6	791.119	27.582	60463.9	-1762.36	134.233	13.026	0.819	2.409	2.874	6.883	0.018	7.335	0.365	0.072	4.988	0.949
1	Test	-92	63	7026332976	2.996	42	15.628	465	59.574	2.408	32	-853	1318	21.979	100.67	-3.257	1222266279	0.208	10128.7	0.87	0.704	69.364	98.559	133.176	99.805	129.654	136.582	120487	85.711	0.302	39074.1	0.324	120604	1295.38	35.853	35970.9	-1044.47	45.966	6.198	0.749	1.283	2.095	4.403	0.078	5.165	0.419	0.201	3.738	0.978
1	Test	-368	50	3984618141	4.294	217	3.728	314	137.33	-99.055	-25	-897	1211	96.045	196.133	-1.223	1344372665	0.075	28656.3	0.671	0.396	73.441	185.439	157.651	119.627	146.905	170.495	34756.4	124.409	0.247	20835.2	0.599	34947.6	1134.24	33.19	84680.4	-2282.01	145.121	14.825	0.81	2.515	2.935	8.164	0.016	7.5	0.363	0.057	5.083	0.954
1	Test	-420	40	33430012002	4.647	298	3.486	1069	156.719	-160.68	-120	-1020	2089	120.295	247.197	-0.838	7232136915	0.049	35288.4	0.536	0.448	63.69	142.247	126.186	92.514	127.853	134.359	118170	76.265	0.26	44706	0.378	118353	1290.11	35.268	146402	-2523.17	205.589	20.461	0.819	3.002	3.132	10.716	0.007	8.288	0.327	0.036	5.559	0.967
1	Train	-218	57	1392736666	3.751	99	8.313	290	92.03	-40.509	7	-885	1175	48.85	137.578	-2.185	4.3523e+08	0.116	17286.7	0.663	0.472	41.636	88.16	100.508	85.611	119.085	130.84	22931	58.485	0.36	10854.1	0.473	22994.4	1272.99	35.481	44540.8	-1287.73	68.652	12.437	0.676	2.121	2.721	7.737	0.029	6.581	0.393	0.088	4.458	0.96
1	Train	-475	40	182000000000	4.375	269	3.325	533	166.843	-136.932	-47	-869	1402	118.804	245.586	-1.176	12249667449	0.075	41561.9	0.544	0.432	63.738	147.627	129.558	99.693	134.44	136.844	203030	80.25	0.271	61628.3	0.304	203104	981.937	30.41	193892	-4397.01	235.535	7.032	0.94	1.62	2.37	3.997	0.026	7.052	0.375	0.105	5.254	0.974
1	Train	-362	59	1175965236	4.51	223	3.505	260	135.889	-104.36	-48	-821	1081	95.759	197.73	-1.043	2.81359e+08	0.057	28206.2	0.472	0.2	25.86	129.268	101.927	49.831	106.111	110.139	7131.73	61.072	0.316	5667.14	0.795	7196.4	947	30.337	62677.5	-1603.3	125.719	19.835	0.713	2.984	3.137	10.271	0.01	7.943	0.325	0.036	5.235	0.941
1	Train	-212	55	8016742562	3.611	102	7.256	356	87.369	-36.756	10	-942	1298	50.195	124.61	-1.967	1211176505	0.127	14176.8	0.403	0.296	43.588	147.47	123.172	91.087	125.681	128.864	77866.6	59.363	0.285	30943.3	0.397	78000.6	1416.6	37.44	38143.1	-1164.19	67.899	8.795	0.759	1.778	2.475	5.321	0.035	6.262	0.413	0.102	4.365	0.969
1	Test	-97	61	4738364749	3.194	51	14.305	302	57.466	-3.918	21	-912	1214	24.816	94.212	-2.959	1073769541	0.17	8860.5	0.527	0.343	48.262	140.56	126.139	83.892	118.034	127.357	120836	74.079	0.306	38587.6	0.319	120977	1421.91	37.597	23876.8	-739.587	39.124	5.689	0.735	1.411	2.211	3.564	0.049	5.634	0.444	0.12	3.938	0.974
1	Test	-97	72	6343951414	3.16	55	13.329	589	57.958	6.217	33	-862	1451	26.463	92.039	-2.844	6.14375e+08	0.168	8432.48	0.398	0.28	40.114	143.391	112.711	61.484	114.587	115.37	72476.1	57.126	0.297	28347.6	0.391	72525.7	1300.32	35.934	24722.3	-775.824	41.03	4.882	0.777	1.396	2.178	2.79	0.044	5.638	0.452	0.107	3.916	0.978
1	Train	-430	46	10736625945	4.579	270	3.173	825	157.436	-135.499	-66	-943	1768	115.017	233.802	-0.998	3199760753	0.057	36303.5	0.495	0.453	75.089	165.719	150.608	110.224	145.773	151.197	58358	82.038	0.248	29286.6	0.502	58535.6	1196.93	34.013	117696	-2733.38	179.321	19.807	0.794	3.025	3.16	10.117	0.01	8.071	0.326	0.042	5.345	0.961
1	Train	-208	72	1028490661	3.754	103	7.373	227	91.875	-26.126	22	-782	1009	50.887	130.661	-2.019	2.417e+08	0.115	16389.8	0.775	0.621	37.625	60.583	101.884	92.299	70.697	102.797	14087.7	46.955	0.353	7985.78	0.567	14157.4	1036.99	31.974	41139.4	-1253.82	70.293	11.804	0.697	2.155	2.733	6.835	0.028	6.634	0.384	0.088	4.451	0.954
1	Train	-286	63	1188179685	4.174	162	4.865	691	113.789	-65.051	-9	-822	1513	73.27	160.855	-1.441	3.54105e+08	0.08	21642.8	0.245	0.185	27.098	146.125	110.699	53.992	45.413	110.829	13630.3	35.748	0.354	7794.14	0.572	13685.5	1014.99	31.512	55042	-1573.36	101.308	13.566	0.757	2.483	2.919	7.115	0.015	7.427	0.356	0.048	4.923	0.963
[truncated: 2,216 more columns]
